# Supplementary material
Source: HighWire-hosted journal article supplement (https://erj.ersjournals.com/content/58/2/2101016)
Supplement: inline-supplementary-material-1 [file inline-supplementary-material-1.pdf]

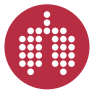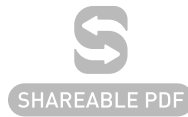

# Similarity network fusion for the integration of multi-omics and microbiomes in respiratory disease

Jayanth Kumar Narayana <sup>1</sup>, Micheál Mac Aogáin <sup>1</sup>, Nur A'tikah Binte Mohamed Ali<sup>1</sup>,  
Krasimira Tsaneva-Atanasova <sup>2</sup> and Sanjay H. Chotirmall <sup>1</sup>

<sup>1</sup>Lee Kong Chian School of Medicine, Nanyang Technological University Singapore, Singapore. <sup>2</sup>Dept of Mathematics, College of Engineering, Mathematics and Physical Sciences, University of Exeter, Exeter, UK.

Corresponding author: Sanjay H. Chotirmall ([schotirmall@ntu.edu.sg](mailto:schotirmall@ntu.edu.sg))

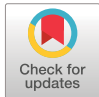

Shareable abstract (@ERSpublications)

**Similarity network fusion (SNF) is increasingly employed for multi-omics and microbiome data integration and assists patient endotyping. This Methods article describes its performance and explores current and future applications in respiratory medicine.** <https://bit.ly/3gtoYq9>

**Cite this article as:** Narayana JK, Mac Aogáin M, Ali NABM, *et al.* Similarity network fusion for the integration of multi-omics and microbiomes in respiratory disease. *Eur Respir J* 2021; 58: 2101016 [DOI: 10.1183/13993003.01016-2021].

This single-page version can be shared freely online.

Copyright ©The authors 2021. For reproduction rights and permissions contact [permissions@ersnet.org](mailto:permissions@ersnet.org)

Received: 8 April 2021  
Accepted: 4 June 2021

Advances in platform technologies facilitate the design of large-scale “multi-omic” studies that encompass genomic, transcriptomic, proteomic, epigenomic, metabolomic and microbiomic components, each representing different views of a single biological specimen [1]. While useful, this is analogous to the “Flatland” *jeu d’esprit*, where the same reality (*i.e.* a sphere of constant diameter) is subject to different interpretations (*i.e.* circles of varying diameter) depending on one’s point of view (from various two-dimensional cross sections). Although each -omics approach has value, they can be even more useful if holistically modelled through appropriate integration. While “mono-omic” analysis has been extremely beneficial, from a systems medicine perspective, this may fail to capture the emergent properties of an individual system and hence may yield limited understanding of non-linear and dynamic features, all of which are increasingly evident in the pathogenesis of respiratory disease [1]. There is clearly a growing need for a more holistic “all in” integration methodology that leverages each distinct -omic dataset derived from multi-omic studies (figure 1). Although several integrative methodologies are available (*e.g.* mixOmics, Anvi’o and integrOmics), similarity network fusion (SNF) has emerged as an appropriate, applicable and robust method in respiratory disease [2–4].
